# Supplementary material
Source: ML conference proceedings conference paper supplement (https://openaccess.thecvf.com/content/ICCV_2017/html/Barman_SHaPE_A_Novel_ICCV_2017_paper.html)
Supplement: Supplementary file 1 [file Barman_SHaPE_A_Novel_ICCV_2017_supplemental.pdf]

Supplementary material for “SHaPE: A Novel  
Graph Theoretic Algorithm for Making  
Consensus-based Decisions in Person  
Re-identification Systems”

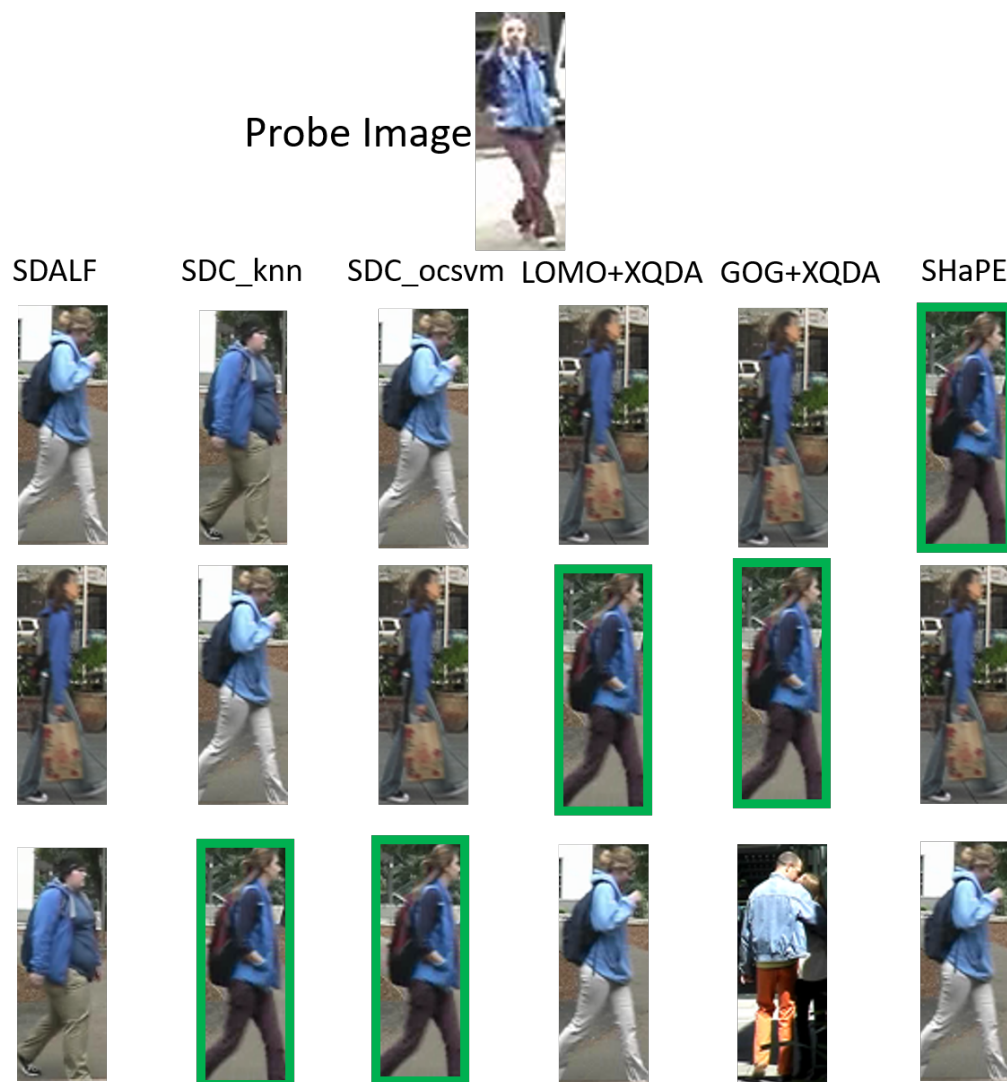

Figure 1: An example probe image with the top 3 matches for re-identification results using 5 individual algorithms and their consensus using SHaPE for VIPeR dataset

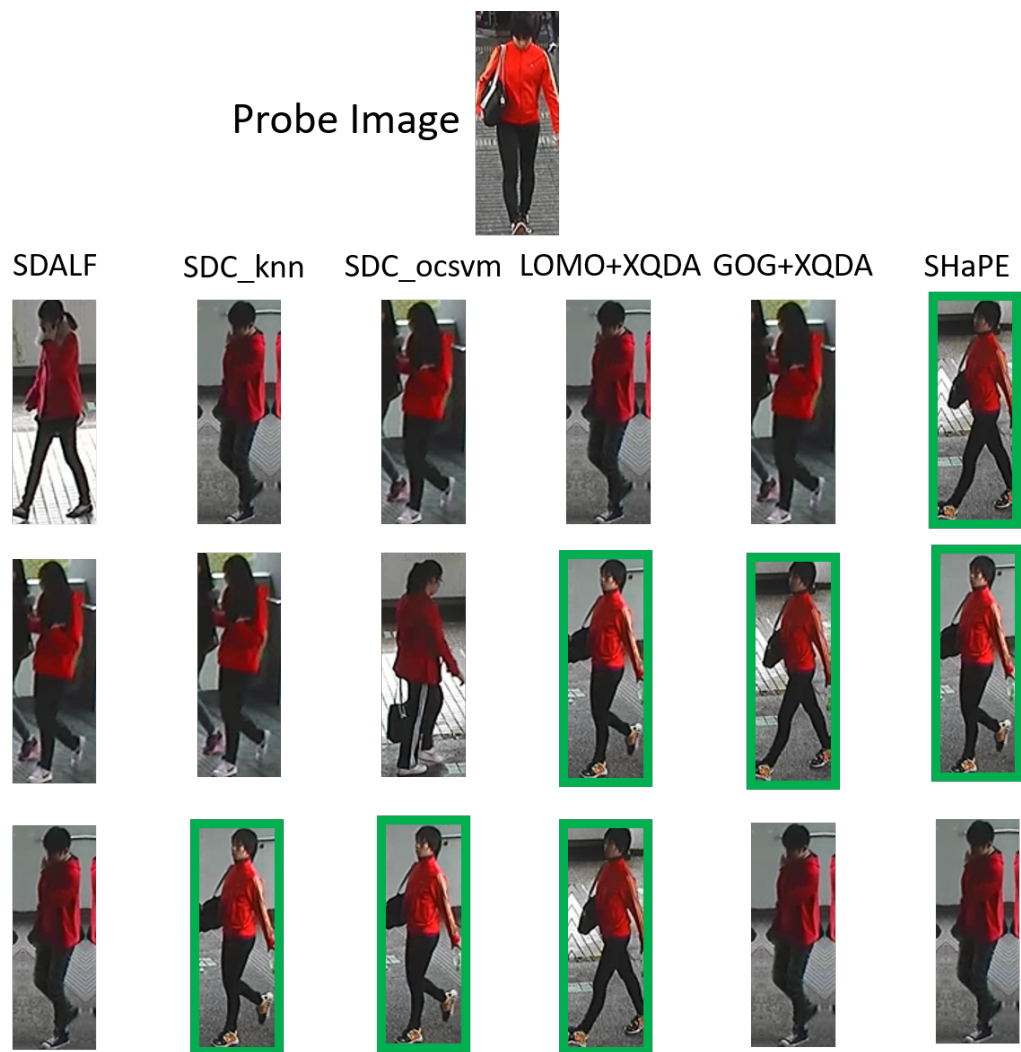

Figure 2: An example probe image with the top 3 matches for re-identification results using 5 individual algorithms and their consensus using SHaPE for CUHK01 dataset

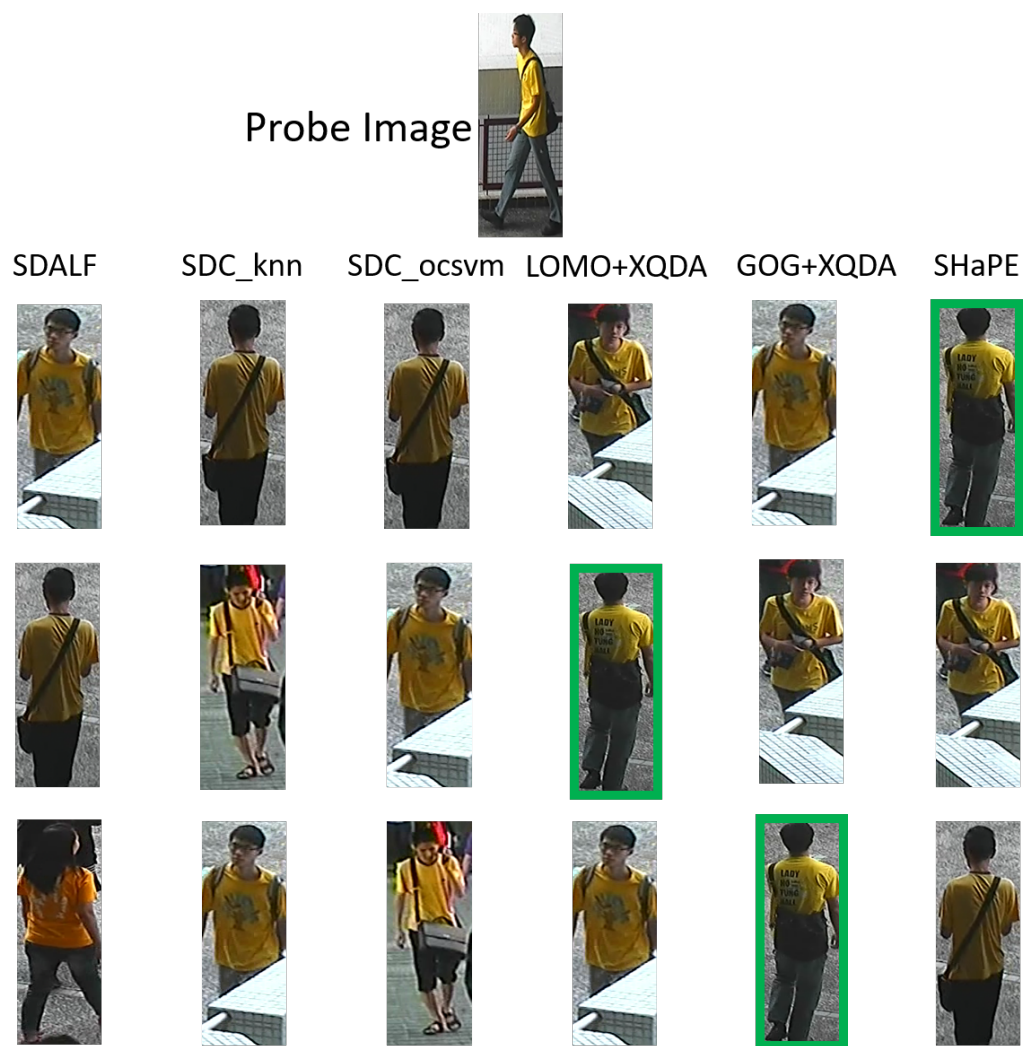

Figure 3: An example probe image with the top 3 matches for re-identification results using 5 individual algorithms and their consensus using SHaPE for CUHK03 dataset
